# Supplementary material for: Fabrication of planar nanofluidic channels in a thermoplastic by hot-embossing and thermal bonding
Source: Royal Society of Chemistry journal article supplement (doi:10.1039/b616134k), 2007-01-01
Supplement: b616134k.doc [file b616134k.doc]

Supplementary Material (ESI) for Lab on a Chip

This journal is © The Royal Society of Chemistry 2007

Fabrication of Planar Nanofluidic Channels in a Thermoplastic by Hot-embossing and Thermal Bonding

Patrick Abgrall,*a* Lee-Ngo Low*b* and Nam-Trung Nguyen**a*

Receipt/Acceptance Data [DO NOT ALTER/DELETE THIS TEXT]

a Singapore-MIT Alliance, Nanyang Technological University, 50 Nanyang Avenue, Singapore. Fax: +65 6791 1859; Tel: +65 6790 4457; E-mail: mntnguyen@ntu.edu.sg

b Singapore Polytechnic, 500 Dover Road, Singapore

Publication data [DO NOT ALTER/DELETE THIS TEXT]

DOI: 10.1039/b000000x [DO NOT ALTER/DELETE THIS TEXT]

**Silicon mold fabrication.** Four-inches silicon wafers with of thickness of 525μm were used. First, the silicon wafers were washed in a piranha solution (H2SO4:H2O2 at 3:1) for 10 min, rinsed in deionized (DI) water and dried with nitrogen. Next, the wafers were dipped in a buffered oxide etch solution for 1 minute, rinsed in DI water and dried with nitrogen. After an additional drying step at 120ºC for 30min, hexamethyldisilazane (HMDS) was spin-coated at a speed of 3000 rpm, an acceleration of 3000 rpm.s-1 in 30 seconds to improve the adhesion of the photoresist. Subsequently, a layer of photoresist (AZ1512, Clariant, Singapore) was spin-coated at a speed of 3000 rpm, an acceleration of 3000 rpm.s-1 for 30 seconds. The photoresist was baked for 90 seconds at 100 ºC and subsequently exposed to UV light with an intensity of 20mW.cm-2 through the photomask for 3 seconds using a contact aligner (MA6, Süss MicroTec AG, Germany). The resist layer was structured in a bath of developer (AZ developer, Clariant, Singapore) for 150 seconds, rinsed in DI water and dried with nitrogen. Silicon was then etched by Reactive Ion Etching (RIE) using CF4 at a flow rate of 30 sccm, O2 at a flow rate of 5 sccm, at a base pressure of 40 Pa and a RF power of 300 W in a RIE system (RIE-10NR, SAMCO Inc., Japan). The photoresist was removed in an ultrasonic bath of acetone for 10 min. The resulting etching rate of 1.26 nm/sec was measured with a contact profiler (DEKTAK 6M, Veeco Instruments Inc., USA). This slow etching rate allows a convenient control of the depth with nanometers resolution. Finally, the mold was cleaned with an oxygen plasma and an ultra-thin fluorocarbon polymer film was deposited from C4F8 using the passivation layer step of the Bosch process (STS ICP Multiplex, Surface Technology System plc, UK). The role of this layer is to ease the release of the mold from the replica after the hot embossing step. According to the deposition rate measured on a layer of 100 nm, the thickness of this anti-adhesion is estimated to be below 5 nm. A decrease in the hydrophobicity of the layer was noticed after a few embossing steps, so this final step of cleaning/anti-adhesion layer depositing was repeated every two or three embossing steps. This solution was chosen for convenience but this lack of durability could be solved by the use of self-assembled monolayers of fluorosilanes such as 1H, 1H, 2H, 2H-perfluorodecyltrichlorosilane.1

**Hot embossing of PMMA.** Commercially available PMMA sheets (Yin Kwang Acrylic Trading, Singapore) were cut in four-inches wafers using a CO2 laser (M300-laser platform, Universal Laser Systems Inc., USA). First they were cleaned in an ultrasonic bath of isopropanol for 5 min, then dried with nitrogen and baked in an oven at 85ºC for 10 min. A wafer bonder (EV501, EV Group, Austria) was used for the hot embossing step. A PMMA wafer was placed in the chamber between the mold at the bottom and a flat silicon wafer on the top to ensure minimum roughness on both of its sides. Two levels of applied forces (2 kN and 7 kN) were used within a range of temperature of the bottom plate from 120 up to 180ºC.

The glass transition temperature *T*g of PMMA is around 105ºC.2 This value may slightly vary depending on the supplier. The viscous behavior of PMMA above *T*g allows it to flow easily in the structures of the mold. Increasing the temperature reduces the viscosity and consequently causes a faster flow of the polymer inside the mold. But high temperatures also generate a higher residual stress and a longer cooling step. Moreover, PMMA starts to undergo degradation at temperatures around 180 ºC.3

The embossing cycle started with a heating phase over 5 to 10 min depending on the target temperature while the chamber was evacuated. Once the target temperature was reached, embossing force was applied on the stack of wafers for 30 min. Finally the bottom plate was cooled down to 70 ºC, the applied force was released and the silicon wafers were manually removed from the PMMA wafer. The cooling rate was between 1 and 2 ºC.min-1, and the total process time was between 80 and 240 min.

Typical AFM and Scanning Electron Microscope (SEM) image are shown in Fig. 1 and 2 respectively. The error in percent between the dimensions measured on the silicon mold and the dimensions measured on the replica are summarized in Table 1.

Notes and references

1. N. S. Cameron, A. Ott, H. Roberge and T. Veres, *Soft Matter*, 2006, **2**, 553-557.

2. H. Becker and C. Gartner, *Electrophoresis*, 2000, **21**, 12-26.

3. Y. Sun, Y. C. Kwok and N. T. Nguyen, *J. Micromech. Microeng.*, 2006, **16**, 1681-1688.

**Table S1.** Error on the different dimensions generated during the embossing step

| **Force [kN]** | **Temp [°C]** | **Error between expected and measured value [%]** | | |
| --- | --- | --- | --- | --- |
| **Depth** | **Period** | **Width** |
| 2 | 120 | 1.10 | 1.87 | 1.67 |
| 140 | 0.44 | 0.77 | 1.91 |
| 160 | 1.65 | 1.04 | 2.40 |
| 180 | 1.81 | 1.63 | 2.55 |
| 7 | 120 | 1.29 | 1.67 | 2.66 |
| 140 | 0.51 | 2.14 | 2.37 |
| 160 | 0.44 | 0.57 | 2.26 |
| 180 | 2.53 | 0.61 | 3.84 |


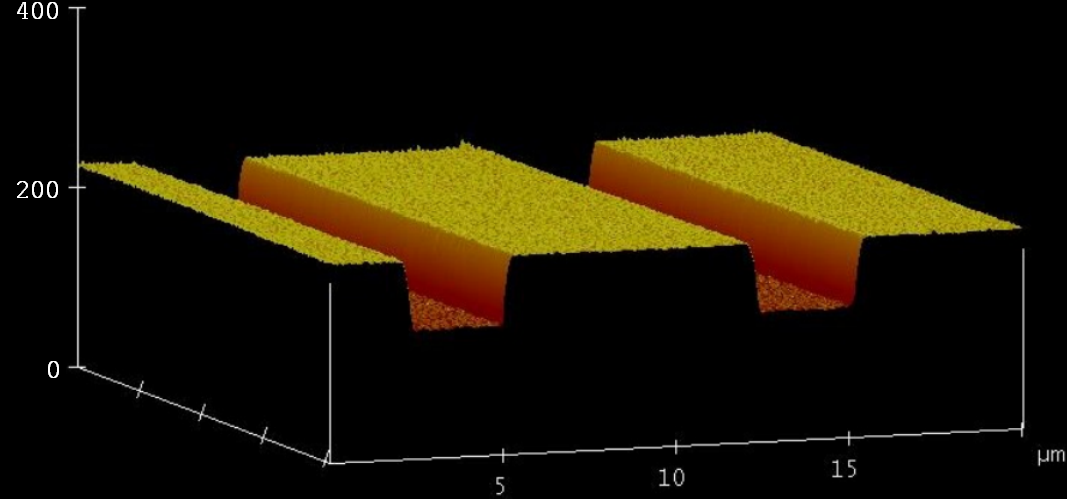


**Fig. S1.** AFM image of open planar nanochannels with a width of 4.6μm and a depth of 80nm (temperature 140ºC, applied force 2kN, vertical scale 200nm)


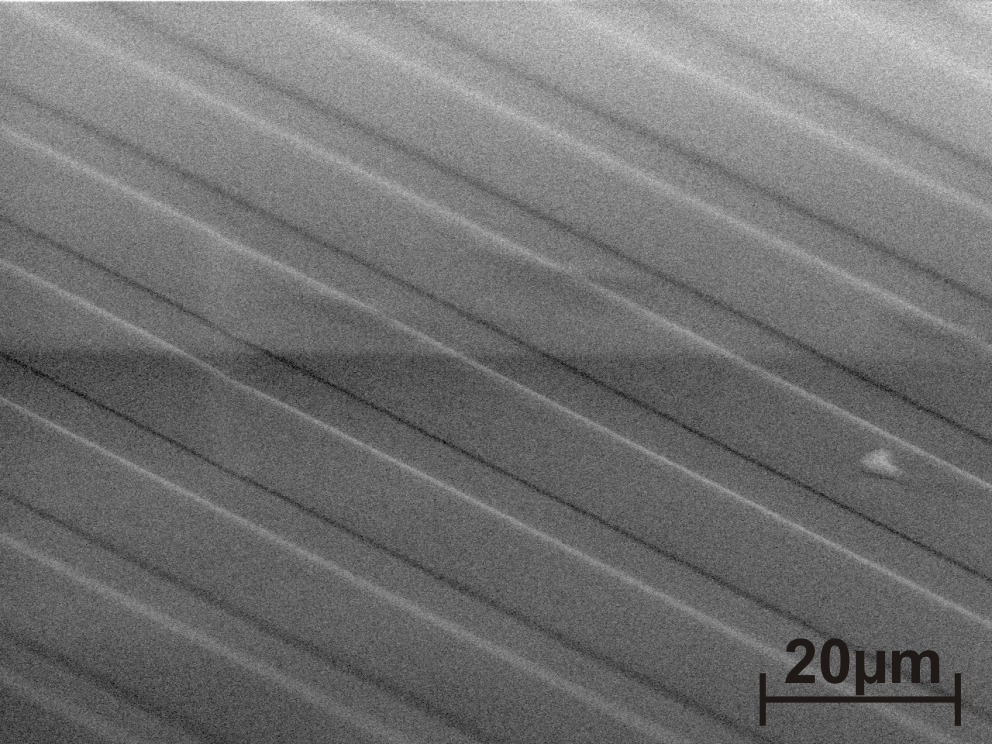


**Fig. S2.** SEM image of open planar nanochannels with a width of 4μm and a depth of 80nm (temperature 180ºC, applied force 7kN, acceleration voltage 18kV)
